# Supplementary material
Source: PubMed Central journal article supplement (PMC6447053)
Supplement: NIHMS1524906-supplement-10549_2018_5087_MOESM1_ESM.pdf [file NIHMS1524906-supplement-10549_2018_5087_MOESM1_ESM.pdf]

**SUPPLEMENTAL MATERIALS**  
**Supplemental Tables S1 and S1**  
**Supplemental Figure S1**

| Source                              | Population             | Variant Allele Count | Total Allele Count | Allele Frequency |                |
|-------------------------------------|------------------------|----------------------|--------------------|------------------|----------------|
| Exome Aggregation Consortium (ExAC) |                        | 312                  | 31964              | .0098            | *2 homozygotes |
|                                     | Finnish                | 55                   | 708                | .0777            |                |
|                                     | European (non-Finnish) | 222                  | 17332              | .0128            | *2 homozygotes |
|                                     | Latino                 | 25                   | 2288               | .0109            |                |
|                                     | African                | 5                    | 2402               | .0021            |                |
|                                     | South Asian            | 5                    | 6288               | .0007            |                |
|                                     | East Asian             | 0                    | 2746               | 0                |                |
|                                     | Other                  | 0                    | 200                | 0                |                |
| Exome Variant Server (GO-ESP)       |                        | 31                   | 12278              | .0025            | *0 homozygotes |
|                                     | European American      | 27                   | 8156               | .0033            |                |
|                                     | African American       | 4                    | 4122               | .0010            |                |
| Atherosclerosis Risk in Communities |                        | 44                   | 15726              | .0028            |                |
|                                     | European American      | 40                   | 10230              | .0039            |                |
|                                     | African American       | 4                    | 5496               | .0007            |                |
| TOPMed                              |                        | 78                   |                    | .0027            |                |
| 1000 Genomes                        |                        | 8                    |                    | .0016            |                |

**Supplemental Table S1: ER S118P variant allele frequency in the general population categorized by population.** Data from Table 1 subcategorized by demographic populations.

| Variable                                                                       | Cancer-free (N=268) | BC survivors (N=268) |
|--------------------------------------------------------------------------------|---------------------|----------------------|
| Age at baseline, years, mean (SD)                                              | 50.1 (11.2)         | 50.6 (11.3)          |
| Postmenopausal, %                                                              | 44.4                | 60.4                 |
| Age at menopause, years, mean (SD)                                             | 49.7 (6.3)          | 48.9 (5.4)           |
| BMI, kg/m <sup>2</sup> , mean (SD)                                             | 27.0 (6.6)          | 26.2 (5.6)           |
| Physical activity, mean MET-h/week (SD) <sup>a</sup>                           | 27.4 (31.8)         | 26.7 (30.3)          |
| Smoking, %                                                                     |                     |                      |
| Never                                                                          | 58.6                | 54.9                 |
| Former                                                                         | 36.2                | 40.3                 |
| Current                                                                        | 4.5                 | 4.5                  |
| Missing                                                                        | 0.7                 | 0.4                  |
| Alcohol intake, mean (SD)                                                      | 6.6 (10.3)          | 5.8 (10.0)           |
| Time from diagnosis to baseline, years, mean (SD)                              | -                   | 2.8 (4.2)            |
| Age at diagnosis, years, mean (SD)                                             | -                   | 47.8 (10.9)          |
| Breast cancer stage, %                                                         |                     |                      |
| In situ                                                                        | -                   | 0.7                  |
| Stage I-III                                                                    | -                   | 96.6                 |
| Stage IV                                                                       | -                   | 2.6                  |
| ER-status, %                                                                   |                     |                      |
| Negative                                                                       | -                   | 23.9                 |
| Positive                                                                       | -                   | 75.0                 |
| Missing                                                                        | -                   | 1.1                  |
| PR-status, %                                                                   |                     |                      |
| Negative                                                                       | -                   | 31.7                 |
| Positive                                                                       | -                   | 67.2                 |
| Missing                                                                        | -                   | 1.1                  |
| HER2 status, %                                                                 |                     |                      |
| Negative                                                                       | -                   | 81.3                 |
| Positive                                                                       | -                   | 14.6                 |
| Unknown/Missing                                                                | -                   | 4.1                  |
| Triple negative breast cancer, %                                               | -                   | 18.7                 |
| <sup>a</sup> Metabolic equivalents from recreational and occupational activity |                     |                      |

**Supplemental Table S2: Breast and Ovarian Surveillance Service (BOSS) cohort characteristics.** Cohort of individuals with a family history of breast cancer (BC).

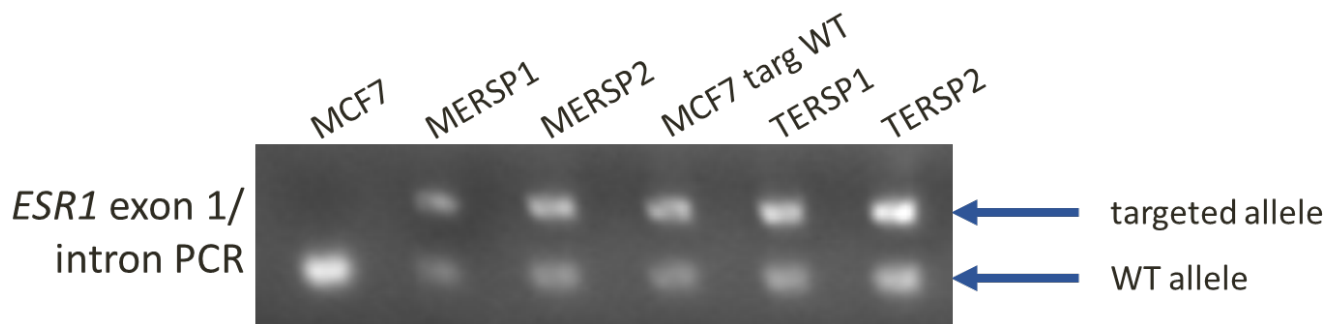

**Figure S1:** A polymerase chain reaction using primers spanning the intronic loxP scar following *ESR1* exon 1 shows two products: the smaller band contains the wild-type sequence, while the larger band indicates targeting of one allele due to presence of the resulting 121 base pair residual sequence from the targeting construct.
